# Supplementary material
Source: PubMed Central journal article supplement (PMC8575517)
Supplement: Coleman.pdf [file Coleman.pdf]

**Supplemental materials for**

Coleman KF, Krakauer C, Anderson M, et al. Building quality improvement capacity in small primary care practices. *Ann Fam Med*. 2021;19(6):499-506.

| <b>Supplemental Table 1. Comparing Practices With and Without Both QICA Evaluations</b> |                                                |                                                         |  |                            |
|-----------------------------------------------------------------------------------------|------------------------------------------------|---------------------------------------------------------|--|----------------------------|
|                                                                                         | <b>Completed<br/>both QICA<br/>Evaluations</b> | <b>Missing at<br/>least one<br/>QICA<br/>evaluation</b> |  | <b>p-value<sup>†</sup></b> |
|                                                                                         | (n=165)                                        | (n=44)                                                  |  |                            |
| <b>Practice characteristics</b>                                                         |                                                |                                                         |  |                            |
| Site, n(%)                                                                              |                                                |                                                         |  |                            |
| Qualis Health (Washington & Idaho)                                                      | 103 (64.2%)                                    | 6 (13.6%)                                               |  | <0.001                     |
| ORPRN (Oregon)                                                                          | 59 (35.8%)                                     | 38 (86.4%)                                              |  |                            |
| Location, n(%)                                                                          |                                                |                                                         |  |                            |
| Rural                                                                                   | 75 (45.5%)                                     | 16 (36.4%)                                              |  | 0.28                       |
| Urban                                                                                   | 90 (54.5%)                                     | 28 (63.6%)                                              |  |                            |
| Number of clinicians, n(%)                                                              |                                                |                                                         |  |                            |
| One (solo)                                                                              | 31 (18.8%)                                     | 8 (18.2%)                                               |  | 0.79                       |

|                                                          |                     |                     |                    |
|----------------------------------------------------------|---------------------|---------------------|--------------------|
| 2 to 5                                                   | 85 (51.5%)          | 25 (56.8%)          |                    |
| 6 or more                                                | 49 (29.7%)          | 11 (25.0%)          |                    |
| Average panel size for full-time clinician, mean (SD)    | 1186.33<br>(821.71) | 1082.22<br>(614.09) | 0.48               |
| Number of patient visits per week at practice, mean (SD) | 253.68<br>(247.59)  | 219.57 (209.12)     | 0.40               |
| Organizational type, n(%)                                |                     |                     |                    |
| FQHC                                                     | 22 (13.3%)          | 0 (0.0%)            | 0.07 <sup>‡</sup>  |
| Health/Hospital system                                   | 60 (36.4%)          | 21 (47.7%)          |                    |
| IHS/Tribal                                               | 8 (4.8%)            | 2 (4.5%)            |                    |
| Independent                                              | 75 (45.5%)          | 21 (47.7%)          |                    |
| Specialty, n(%)                                          |                     |                     |                    |
| Family Medicine                                          | 129 (78.2%)         | 41 (93.2%)          | 0.03 <sup>††</sup> |
| Internal Medicine                                        | 5 (3.0%)            | 2 (4.5%)            |                    |
| Mixed                                                    | 31 (18.8%)          | 1 (2.3%)            |                    |
| <b>Patient population</b>                                |                     |                     |                    |
| White, mean clinic-level percent (sd)                    | 78.90 (23.73)       | 75.69 (26.68)       | 0.56               |

|                                           |               |                            |      |
|-------------------------------------------|---------------|----------------------------|------|
| Hispanic, mean clinic- level percent (sd) | 9.72 (14.72)  | 5.42 (4.66)                | 0.17 |
| Female, mean clinic- level percent (sd)   | 54.37 (7.68)  | 54.24 (8.56)               | 0.94 |
| Age, mean clinic- level percent (sd)      |               |                            |      |
| <17                                       | 13.17 (9.14)  | 12.83 (8.48)               | 0.87 |
| 18-39                                     | 25.26 (10.57) | 23.44 (8.89)               | 0.43 |
| 40-59                                     | 28.78 (10.05) | 28.14 (6.45)               | 0.76 |
| 60-75                                     | 21.74 (10.45) | 23.98 (10.63)              | 0.34 |
| >75                                       | 10.35 (11.47) | 11.49 (7.01)               | 0.64 |
| Insurance type, mean level percent (sd)   |               |                            |      |
| Medicare                                  | 24.68 (16.69) | 24.24 (17.11)              | 0.90 |
| Medicaid                                  | 24.62 (20.80) | 23.09 (14.96)              | 0.73 |
| Dual (Medicare and Medicaid)              | 3.46 (6.89)   | 5.57 (9.10)                | 0.18 |
| Commercial                                | 36.10 (22.85) | 36.43 (20.08)              | 0.95 |
| Uninsured                                 | 7.80 (13.50)  | 5.28 (7.52)                | 0.36 |
| Other                                     | 3.40 (8.48)   | 5.42 (11.11)               | 0.30 |
| <b>Baseline: QICA 1</b>                   |               |                            |      |
| QICA 1, mean (sd)                         | 6.45 (0.11)   | 7.02 (1.85)<br><i>n=37</i> | 0.03 |

**Baseline: Blood pressure CQM**

Site achieved Million Hearts goal of  $\geq 70\%$  eligible patients with BP ( $<140/90$ ), n (%)

|            |           |      |
|------------|-----------|------|
| 38 (23.0%) | 6 (13.6%) | 0.17 |
|------------|-----------|------|

† p-values are the results of Pearson's chi-squared tests for binary/categorical variables (see result of Fisher's exact test for select variables below) and t-tests otherwise.

‡ p-value of 0.03 with Fisher's exact test.

†† p-value of 0.01 with Fisher's exact test.

## Supplemental Appendix

### Clinical Quality Measure Specifications

The clinical measure for aspirin (CMS164)<sup>29</sup> was defined as the percentage of patients 18 years of age and older who were discharged alive for acute myocardial infarction (AMI), coronary artery bypass graft (CABG), or percutaneous coronary interventions (PCI) in the 12 months prior to the measurement period, or who had an active diagnosis of ischemic vascular disease (IVD) during the measurement period, and who had documentation of use of aspirin or another antithrombotic during the measurement period.

Blood pressure control (CMS 165)<sup>28</sup> was defined as the percent of patients ages 18-85 with previously diagnosed hypertension from each practice who achieved adequate blood pressure control (<140/90).

Smoking cessation (CMS 138)<sup>30</sup> was defined as the percentage of patients aged 18 years and older who were screened for tobacco use one or more times within 24 months and who received cessation counseling intervention if identified as a tobacco user.

The protocol requested each practice submit numerator and denominator data on each measure using a rolling 12-month look-back period.

Our analyses are based on a comparison of data for the fourth quarter 2015, which corresponds to clinical data from calendar year 2015 prior to the interventions, to the fourth quarter of 2017. Data remain missing for some practices due to loss to follow-up; see Figure 1 for further details.
